# Supplementary material for: Solvent-free aerobic oxidation of alcohols using supported gold palladium nanoalloys prepared by a modified impregnation method
Source: Royal Society of Chemistry journal article supplement (doi:10.1039/c4cy00387j), 2014-01-01
Supplement: c4cy00387j1.pdf [file c4cy00387j1.pdf]

## Supporting Information

### **Solvent-free aerobic oxidation of alcohols using supported gold palladium nanoalloys prepared by a modified impregnation method**

Moataz Morad,<sup>a</sup> Meenakshisundaram Sankar,<sup>a,b</sup> Enhong Cao,<sup>c,d</sup> Ewa Nowicka,<sup>a</sup> Thomas E. Davies,<sup>a,e</sup> Peter J. Miedziak,<sup>a</sup> David J. Morgan,<sup>a</sup> David W. Knight,<sup>a</sup> Donald Bethell,<sup>a,e</sup> Asterios Gavriilidis,<sup>c,d</sup> and Graham J. Hutchings\*<sup>a</sup>

<sup>a</sup> *School of Chemistry, Cardiff University, Main Building, Park Place, Cardiff, CF10 3AT, UK.*

<sup>b</sup> *Inorganic Chemistry and Catalysis Group, Debye Institute of Nanomaterials and Science, Utrecht University, Utrecht, The Netherlands.*

<sup>c</sup> *Department of Chemical Engineering, University College London, Torrington Place, London WC1E 7JE, UK.*

<sup>d</sup> *Materials Chemistry Centre, University College London, 20 Gordon Street, London WC1H 0AJ, UK.*

<sup>e</sup> *Department of Chemistry, University of Liverpool, Liverpool L69 3BX, UK*

\*Correspondence to Graham J. Hutchings, Cardiff Catalysis Institute, School of Chemistry, Cardiff University, Cardiff, CF10 3AT (UK), Fax: (+44) 2920-874-030, E-mail:

[hutch@cardiff.ac.uk](mailto:hutch@cardiff.ac.uk)

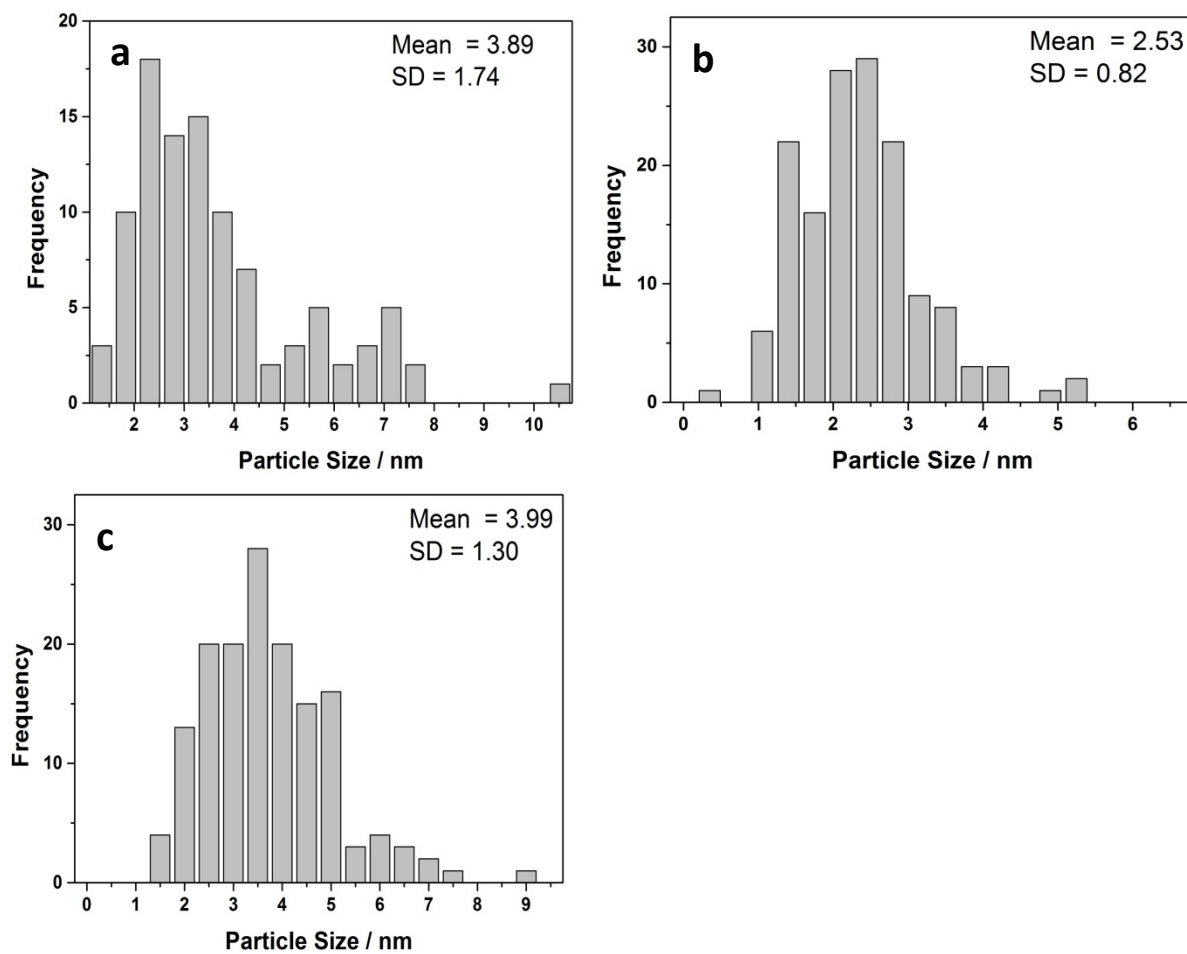

**Figure S1:** Particle size distribution for 1% Au-Pd/ TiO<sub>2</sub> samples used for reaction in Glass reactor prepared by different methods (a) CIm, (b) Sim, (c) Mim

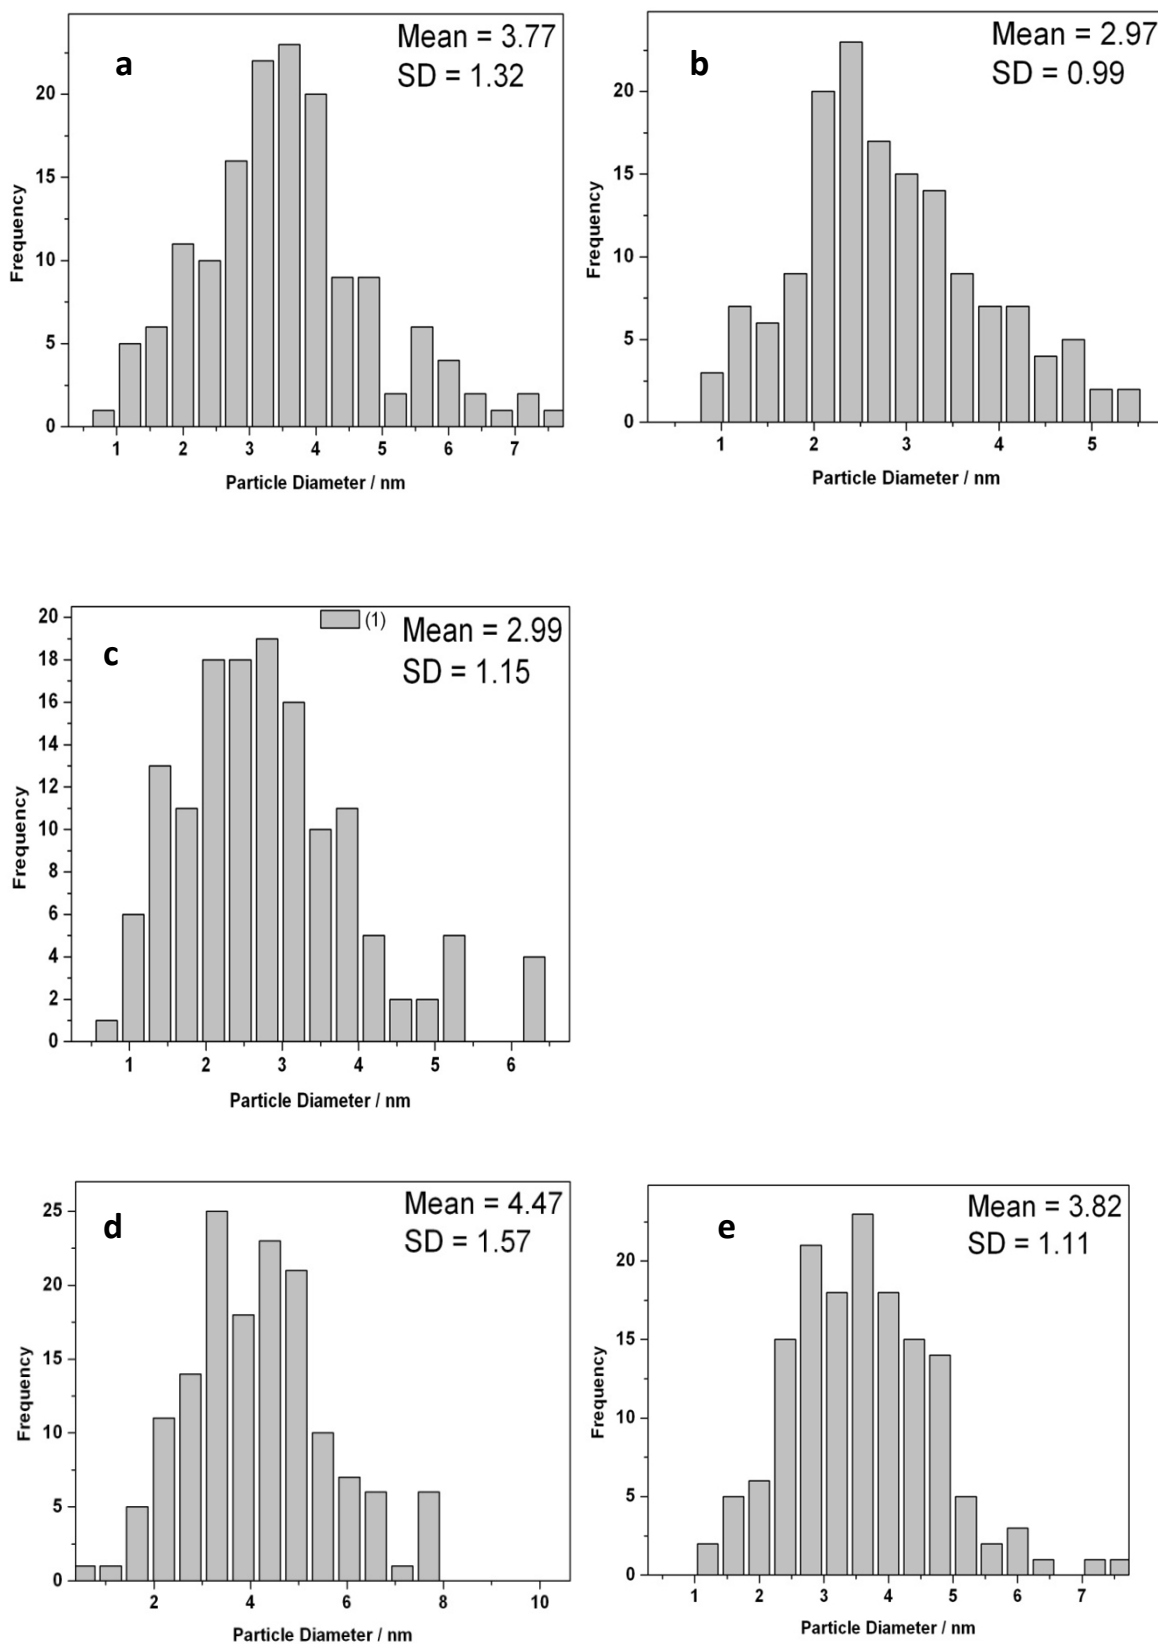

**Figure S2:** Particle size distribution for 1% (Au-Pd)TiO<sub>2</sub> samples used for reaction in MBR Sim: (a) standard reaction, (b) oxidation in O<sub>2</sub> at 120 °C for 1h, (c) activation in reaction

mixture from 80 to 120°C before reaction overnight in O<sub>2</sub>, Mim: (d) standard reaction, (e) activation in reaction mixture from 80 to 120°C before reaction.
